# Supplementary material for: Detailed characterization of lysozyme (Lyz)–surfactant (SDDS) interaction and the structural transitions
Source: Royal Society of Chemistry journal article supplement (doi:10.1039/c5nj01498k), 2016-01-01
Supplement: c5nj01498k1.pdf [file c5nj01498k1.pdf]

## Detailed characterization of Lysozyme (Lyz)-surfactant (SDDS) interaction, and the structural transitions

Bithika Mandal, Soumen Ghosh\* and S. P. Moulik\*

Centre for Surface Science, Department of Chemistry, Jadavpur University, Kolkata – 700032, West Bengal, India

E-mail: [gsoumen70@hotmail.com](mailto:gsoumen70@hotmail.com) & [spmcss@yahoo.com](mailto:spmcss@yahoo.com)

### Supplementary information

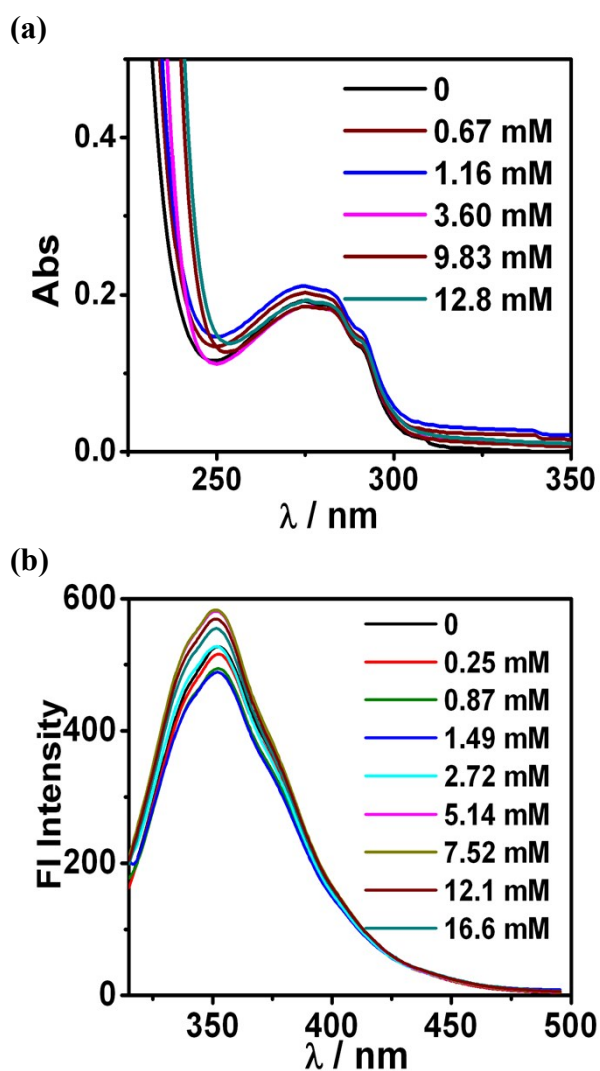

Fig S<sub>1</sub>. UV – Visible and fluorescence spectra of 0.1 mg / ml lysozyme in the absence and presence of SDDS in phosphate buffer pH 7.

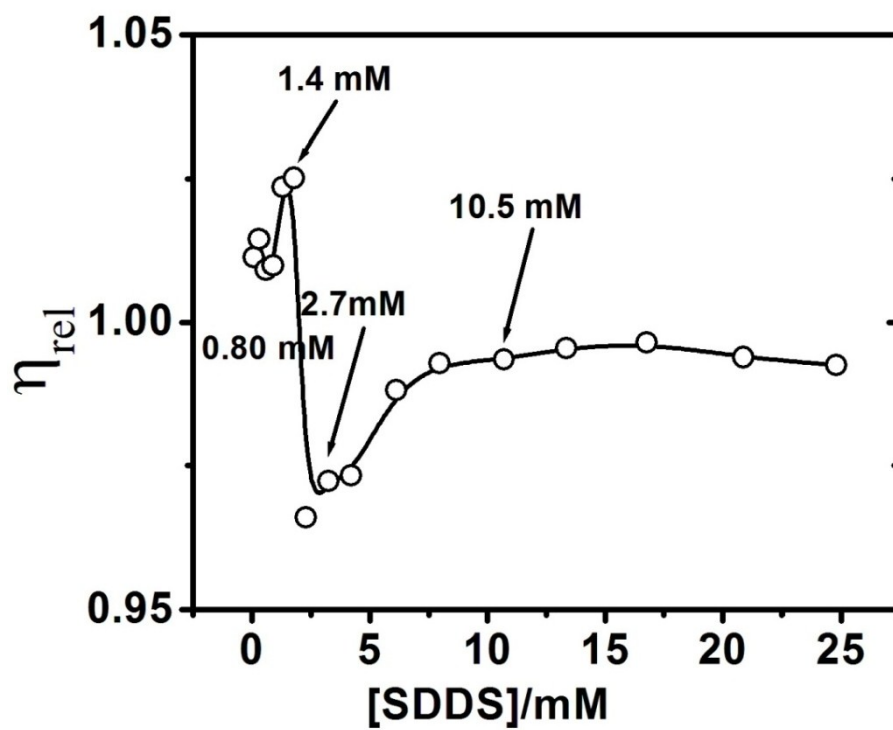

Fig S<sub>2</sub> : Viscosity vs [SDDS] of lysozyme interacted SDDS at pH 7 at 298 K.

Inflections are marked with arrow heads.

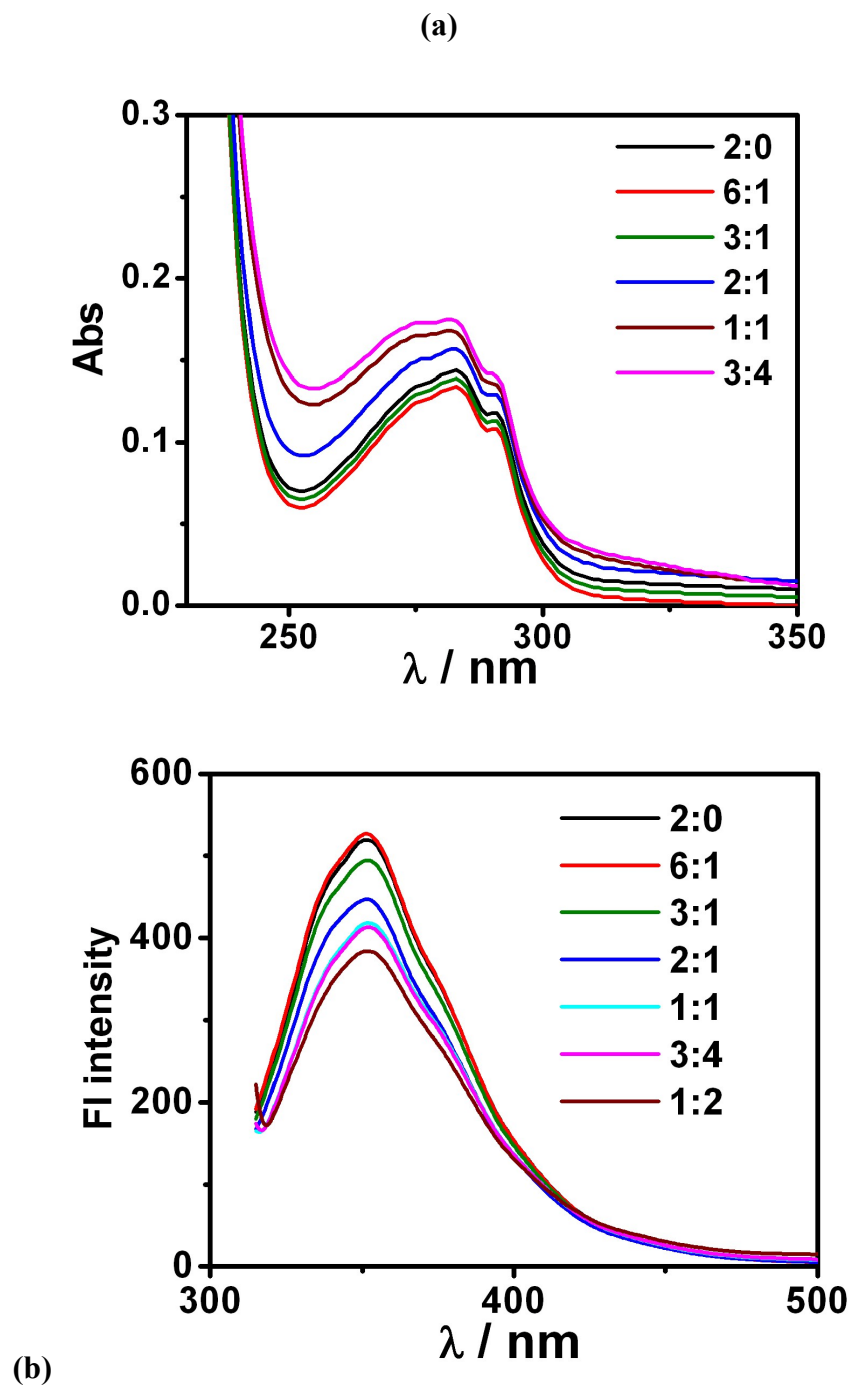

Fig S<sub>3</sub>. (a) Absorbance and (b) fluorescence spectra of lysozyme at different concentration ratio of SDDS to  $\beta$ -CD.

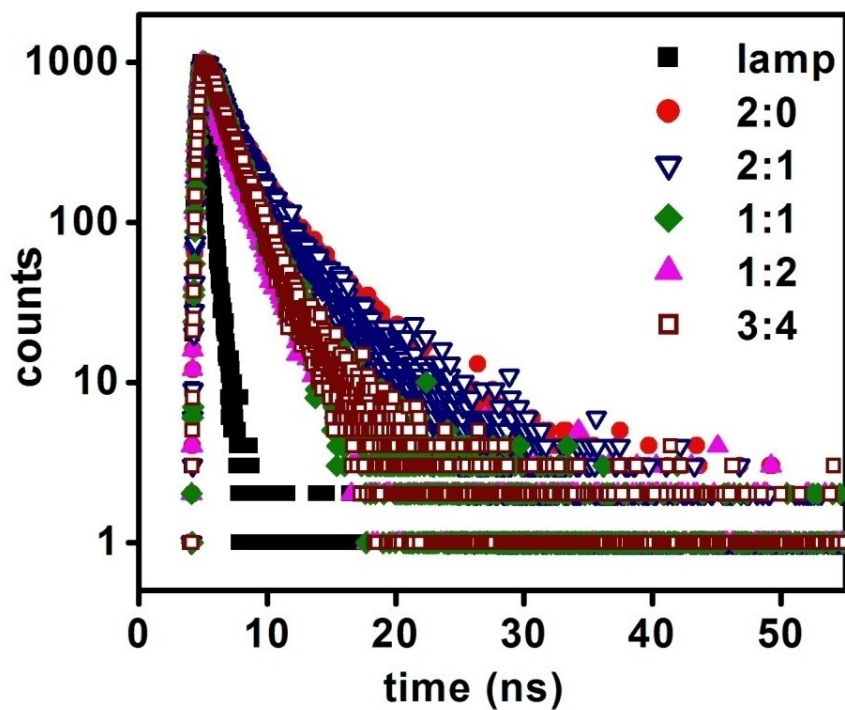

Fig S<sub>4</sub>. Fluorescence life time decays of lysozyme at different concentration ratio of SDDS to  $\beta$ -CD.

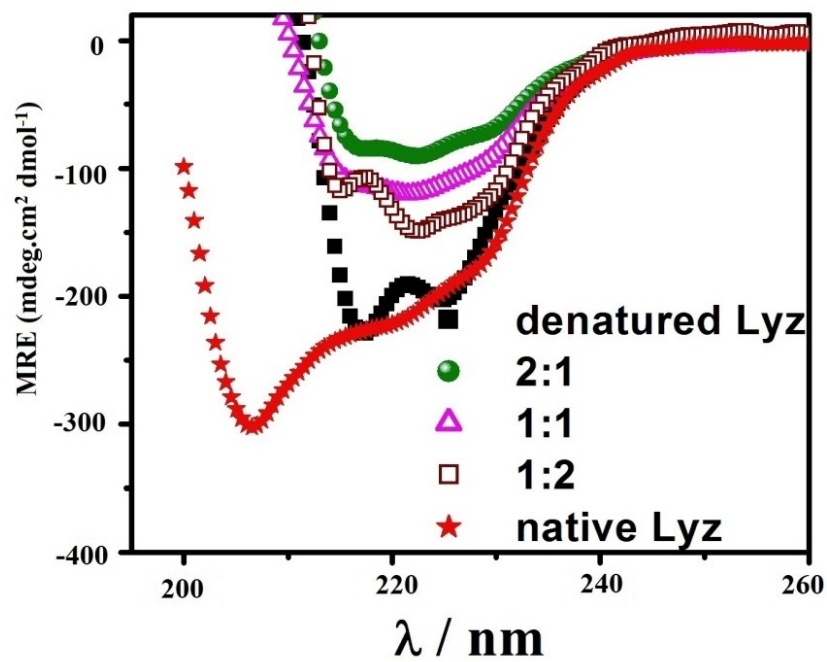

Fig S<sub>5</sub>: Far-UV CD spectra of Lyz at different mole ratios of SDDS:  $\beta$ -CD.
